# Supplementary material for: A 29-gene and cytogenetic score for the prediction of resistance to induction treatment in acute myeloid leukemia
Source: PubMed Central journal article supplement — Haematologica. 2017 Dec 14;103(3):456–65. doi: 10.3324/haematol.2017.178442 (PMC5830382; doi:10.3324/haematol.2017.178442), 2018-03
Supplement: 2017_178442-Disclosures_and_Contributions.pdf [file 2017_178442-Disclosures_and_Contributions.pdf]

Haematologica  
HAEMATOL/2017/178442  
Version 3

A 29-gene and cytogenetic score for the prediction of resistance to  
induction treatment in acute myeloid leukemia

Tobias Herold, Vindi Jurinovic, Aarif M. N. Batcha, Stefanos A. Bamopoulos, Maja Rothenberg-Thurley, Bianka Ksienzyk, Luise Hartmann, Philipp A. Greif, Julia Phillippou-Massier, Stefan Krebs, Helmut Blum, Susanne Amler, Stephanie Schneider, Nikola Konstandin, Maria Cristina Sauerland, Dennis Görlich, Wolfgang E. Berdel, Bernhard J. Wörmann, Johanna Tischer, Marion Subklewe, Stefan K. Bohlander, Jan Braess, Wolfgang Hiddemann, Klaus H. Metzeler, Ulrich Mansmann, and Karsten Spiekermann

Disclosures: This work is in memory of Thomas Büchner, who died while helping the authors with this project. The authors thank all participants of the AMLCG trials and recruiting centers. This work was supported by the Wilhelm-Sander-Stiftung (grant 2013.086.1) to T.H., U.M. and K.S.; by funding from Deutsche Forschungsgemeinschaft (DFG Collaborative Research Centre SFB 1243) to P.A.G., H.B., M.S., W.H., K.H.M. and K.S.; by the “Verein zur Förderung von Wissenschaft und Forschung an der Medizinischen Fakultät der LMU München“ to T.H.. S.K.B. is supported by Leukaemia & Blood Cancer New Zealand and the family of Marijanna Kumerich.

Contributions: T.H., U.M. and K.S. conceived and designed the experiments. T.H., M.R.-T., B.K., L.H. and K.H.M. performed experiments. T.H., V.J., A.M.N.B., S.A.B., M.R.-T. and K.H.M. analyzed data. V.J., A.M.N.B., S.A.B. and U.M. provided bioinformatics support. J.P.-M., S.K. and H.B. managed the Genome Analyzer Iix platform and the RNA sequencing. M.R.-T., B.K., L.H., P.A.G., S.S., N.K., J.T., M.S., J.B., S.K.B. and K.S. characterized patient samples; M.C.S., D.G., J.B., S.A., W.E.B., B.J.W. and W.H. coordinated the AMLCG clinical trials. U.M. and K.S. supervised the project. T.H., V.J., S.A.B., K.H.M. and S.K.B. wrote the manuscript.
