# Supplementary material for: A 29-gene and cytogenetic score for the prediction of resistance to induction treatment in acute myeloid leukemia
Source: PubMed Central journal article supplement — Haematologica. 2017 Dec 14;103(3):456–65. doi: 10.3324/haematol.2017.178442 (PMC5830382; doi:10.3324/haematol.2017.178442), 2018-03
Supplement: HAEMATOL-2017-178442v3-Herold-01.pdf [file HAEMATOL-2017-178442v3-Herold-01.pdf]

# Development of a powerful and robust predictor for primary therapy resistance in acute myeloid leukemia to guide clinical decisions

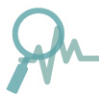

Predictor for therapy resistance

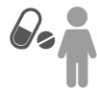

Intensively treated acute myeloid leukemia patients

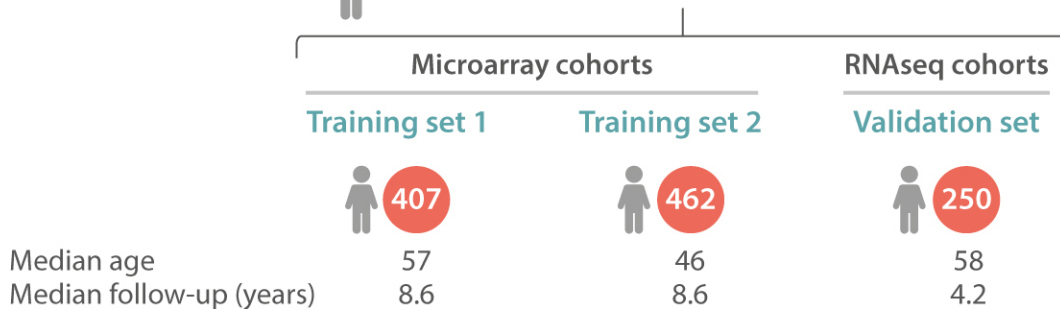

## Predictor PS29MRC

- 29 genes expression markers
- favorable and unfavorable cytogenetic MRC groups

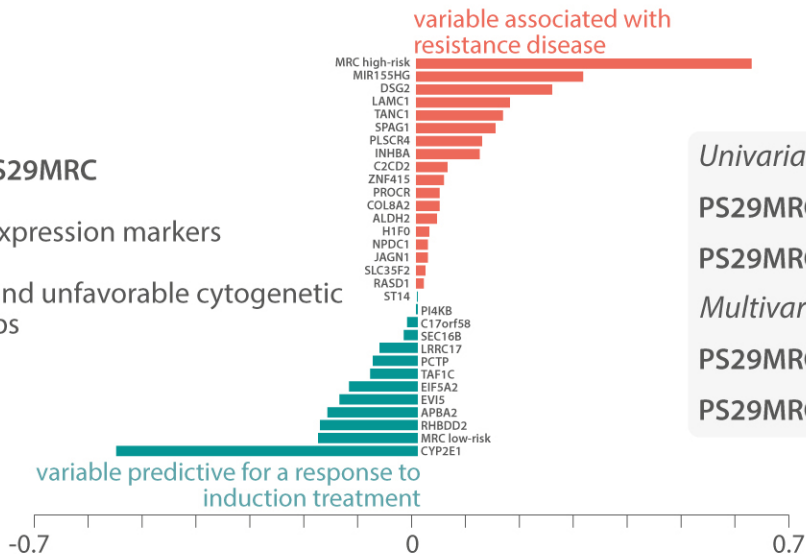

### Univariate analysis

PS29MRCcont OR=2.39 p=8.63 x 10<sup>-9</sup>

PS29MRCdic OR=8.03 p=4.29 x 10<sup>-9</sup>

### Multivariate analysis

PS29MRCcont OR=1.75 p=0.0011

PS29MRCdic OR=4.44 p=0.00021
